# Supplementary material for: An Improved Reference Gene for Detection of “Candidatus Liberibacter asiaticus” Associated with Citrus Huanglongbing by qPCR and Digital Droplet PCR Assays
Source: MDPI journal article supplement (doi:10.3390/plants10102111), 2021-10-05
Supplement: s1 [file s1]

## Supplementary information:

CAAAGGTAGTAGAAGGCTTGATTGAGATTCTTTGGCGACCAAAAAGTTTATCTGCTAGTCTCTGTATTCATTTCTTA  
TTTTGCATGCAG**GGACTGATAGTCAGCTCCCGGAAAGATTCACTTCAACACTTCAAGAAGCCTTGGGCTCATGAACA**  
TTGCATGCAGGGACTGATAG ACACCTCAAGAAGCCTTGGGCTCA GAACA

MDH\_F MDH\_P

**TGAGCCTGTCAACAATCTCTTAGATGCTGTCAAGGT**TTACAGACGTTTCTTTGATTAATGTTTCAGTTTTTTTCAGTG  
**TGAGCCTGTCAACAATC**

MDH\_R

TTTGTGGGTCTTAAACTTTTACTCTCTTTGTCTATAAGGTA**ATCAAGCCAACAATTTTGATTGGATCATCTGGAGTT**  
**GGAAGAACTTTTACAAAAGAGTAATCGAGGCCATGGCCTCCTTCAATGAG**GTAGTGTTTCAGGCTCTCCTTTGGCT  
TATAAGGAAATTTAATTTTGTCTCTTTTCAAACGTATGTTTTAAGTGGGAGAAATTGAGCCTAAAGTGGTTAATG  
CTGGCAG**AAACCTCTCATCCTGGCTCTCTCCAACCCAACCTCACAGTCAGAATGTACAGCTGAAGAAGCTTACACTT**  
**GGAGTAAG**GTACAAACAATAATTCTGCAACACTTTCCAGGCTTCAACTAAGTTGGGGATGCTATTTTGTAAAGTAGA  
CCTGTATTTTCTACACACAGAAAACTAATACTATTGTTATTTACGTTCTCTGCTTTTGATTGAAG**GGTCGTGC**  
**AATTTTCGCTAGTGGAAGTCCATTTGATCCTTTTGAATACAATGGAAAAGTTTTGTTCCTGGCCAG**GTCTATAATC  
ATAATCATTTTGCATTGTGCTAAGATTCTATAATCATATTTCTGTTATATTTTAAATAATTACTAGTTATTGAATA  
GTAGCTGAACCTAGAACGCTTGACATTTTGTCTTTCCCGTGAATCCAGGCCAACATGC

**Figure S1.** Sequence of a 906 bp region of citrus malate dehydrogenase used for designing primers and probe for qPCR and ddPCR assays. The exons in the region are indicated in bold, underlined, highlighted text. The primers and probe sequences are shown in italics. Note that the 5' ten bases of the forward primer are in the intron.

**Table S1.** A list of selected taxa of Aurantioideae used for sequencing 900 bp region of the malate dehydrogenase gene. Accession numbers refer to sequences deposited in Genbank. Taxa with two accession numbers indicate the presence of two haplotypes. Three non-aurantioid taxa were included in the analysis.

| No. | Genus                | species            | Cultivar                    | Subfamily     | Subtribe        | Accession  |
|-----|----------------------|--------------------|-----------------------------|---------------|-----------------|------------|
| 1   | <i>Aegle</i>         | <i>marmelos</i>    | Indian Bael fruit           | Aurantioideae | Balsamocitrinae | JN612891.1 |
| 2   | <i>Aeglopsis</i>     | <i>chevalieri</i>  | Chevalier's Aeglopsis       | Aurantioideae | Balsamocitrinae | JN612892.1 |
| 3   | <i>Afraegle</i>      | <i>paniculata</i>  | Nigerian powder flask fruit | Aurantioideae | Balsamocitrinae | JN676196.1 |
| 4   | <i>Atalantia</i>     | <i>ceylanica</i>   | Ceylon Atalantia            | Aurantioideae | Citrinae        | EU254083.1 |
| 5   | <i>Atalantia</i>     | <i>citroides</i>   | Cochin china Atalantia      | Aurantioideae | Citrinae        | JN612893.1 |
| 6   | <i>Atalantia</i>     | <i>monophylla</i>  | Indian Atalantia            | Aurantioideae | Citrinae        | JN612894.1 |
| 7   | <i>Balsamocitrus</i> | <i>dawei</i>       | Uganda powder flask fruit   | Aurantioideae | Balsamocitrinae | JN612895.1 |
| 8   | <i>Bergera</i>       | <i>koenigii</i>    | Curry leaf                  | Aurantioideae | Clauseninae     | JN612897.1 |
| 9   | <i>Burkillanthus</i> | <i>malaccensis</i> | Malay ghost-lime            | Aurantioideae | Citrinae        | JN612898.1 |
| 10  | <i>Choisya</i>       | <i>ternata</i>     |                             | Rutoideae     | Zanthoxyleae    | JN676195.1 |
| 11  | <i>Citropsis</i>     | <i>daweana</i>     | Mozambique cherry-orange    | Aurantioideae | Citrinae        | JN612899.1 |
| 12  | <i>Citropsis</i>     | <i>gabunensis</i>  | Gabon cherry-orange         | Aurantioideae | Citrinae        | EU254084.1 |

|    |                    |                       |                              |                 |             |                           |
|----|--------------------|-----------------------|------------------------------|-----------------|-------------|---------------------------|
| 13 | <i>Citropsis</i>   | <i>schweinfurthii</i> | Uganda<br>cherry-<br>orange  | Aurantioideae   | Citrinae    | JN612900.1                |
| 14 | <i>Citrus</i>      | <i>amblycarpa</i>     | Nasnaran<br>mandarin         | Aurantioideae   | Citrinae    | EU254103.1;<br>EU254104.1 |
| 15 | <i>Citrus</i>      | <i>aurantifolia</i>   | Mexican<br>lime              | Aurantioideae   | Citrinae    | EU254096.1;<br>EU254097.1 |
| 16 | <i>Citrus</i>      | <i>aurantium</i>      | Rubidoux<br>sour             | Aurantioideae   | Citrinae    | EU254115.1;<br>EU254116.1 |
| 17 | <i>Citrus</i>      | <i>halimi</i>         | Mountain<br>citron           | Aurantioideae   | Citrinae    | KT175681.1;<br>KT175682.1 |
| 18 | <i>Citrus</i>      | <i>hanaju</i>         | Hanayu<br>papeda             | Aurantioideae   | Citrinae    | KT175649.1;<br>KT175650.1 |
| 19 | <i>Citrus</i>      | <i>hongheensis</i>    | Honghe<br>papeda             | Aurantioideae   | Citrinae    | EU254098.1;<br>EU254099.1 |
| 20 | <i>Citrus</i>      | <i>ichangensis</i>    | Ichang<br>papeda             | Aurantioideae   | Citrinae    | EU254094.1;<br>EU254095.1 |
| 21 | <i>Citrus</i>      | <i>limettoides</i>    | Palestine<br>Sweetlime       | Aurantioideae   | Citrinae    | KT175677.1;<br>KT175678.1 |
| 22 | <i>Citrus</i>      | <i>longispina</i>     | Winged lime                  | Aurantioideae   | Citrinae    | EU254119.1;<br>EU254120.1 |
| 23 | <i>Citrus</i>      | <i>maxima</i>         | Siamese<br>sweet<br>pummelo  | Aurantioideae   | Citrinae    | EU254111.1;<br>EU254112.1 |
| 24 | <i>Citrus</i>      | <i>medica</i>         | Ninger giant<br>citron       | Aurantioideae   | Citrinae    | KT175679.1;<br>KT175680.1 |
| 25 | <i>Citrus</i>      | <i>nippokoreana</i>   | Korai<br>mandarin            | Aurantioideae   | Citrinae    | KT175675.1;<br>KT175676.1 |
| 26 | <i>Citrus</i>      | <i>nobilis</i>        | King tangor                  | Aurantioideae   | Citrinae    | EU254092.1;<br>EU254093.1 |
| 27 | <i>Citrus</i>      | <i>reshni</i>         | Cleopatra<br>mandarin        | Aurantioideae   | Citrinae    | JN612910.1;<br>JN612909.1 |
| 28 | <i>Citrus</i>      | <i>reticulata</i>     | Ponkan<br>mandarin           | Aurantioideae   | Citrinae    | EU254132.1;<br>EU254133.1 |
| 29 | <i>Citrus</i>      | <i>sinensis</i>       | Harts Tardiff<br>Valencia    | Aurantioideae   | Citrinae    | JN612919.1;<br>JN612918.1 |
| 30 | <i>Citrus</i>      | <i>unshiu</i>         | Frost Owari<br>satsuma       | Aurantioideae   | Citrinae    | EU254100.1                |
| 31 | <i>Citrus</i>      | <i>webberi</i>        | Kalpi lime                   | Aurantioideae   | Citrinae    | EU254092.1                |
| 32 | <i>Citrus</i>      | <i>wintersii</i>      |                              | Aurantioideae   | Citrinae    | JN612905.1                |
| 33 | <i>Clausena</i>    | <i>excavata</i>       | Pink wampee                  | Aurantioideae   | Clauseninae | JN612906.1                |
| 34 | <i>Clausena</i>    | <i>harmandiana</i>    |                              | Aurantioideae   | Clauseninae | JN612907.1                |
| 35 | <i>Clymenia</i>    | <i>polyandra</i>      |                              | Aurantioideae   | Citrinae    | JN612908.1                |
| 36 | <i>Eremocitrus</i> | <i>glauca</i>         | Australian<br>desert lime    | Aurantioideae   | Citrinae    | JN612903.1                |
| 37 | <i>Flindersia</i>  | <i>australis</i>      | Australian<br>teak           | Flindersioideae |             | JN676194.1                |
| 38 | <i>Glycosmis</i>   | <i>mauritiana</i>     |                              | Aurantioideae   | Clauseninae | JN612910.1                |
| 39 | <i>Glycosmis</i>   | <i>pentaphylla</i>    | Orange<br>berry/Gin<br>berry | Aurantioideae   | Clauseninae | JN612911.1                |

|    |                      |                       |                                |               |                 |            |
|----|----------------------|-----------------------|--------------------------------|---------------|-----------------|------------|
| 40 | <i>Glycosmis</i>     | <i>trichanthera</i>   |                                | Aurantioideae | Clauseninae     | JN612912.1 |
| 41 | <i>Merillia</i>      | <i>caloxylon</i>      |                                | Aurantioideae | Merrilliinae    | JN612913.1 |
| 42 | <i>Microcitrus</i>   | <i>australasica</i>   | Australian<br>finger lime      | Aurantioideae | Citrinae        | EU254132.1 |
| 43 | <i>Micromelum</i>    | <i>minutum</i>        |                                | Aurantioideae | Micromelinae    | JN612914.1 |
| 44 | <i>Monathocitrus</i> | <i>cornuta</i>        | Spotseed-<br>lime              | Aurantioideae | Triphasiinae    | JN612915.1 |
| 45 | <i>Murraya</i>       | <i>paniculata</i>     | Orange<br>jasmine              | Aurantioideae | Clauseninae     | JN612919.1 |
| 46 | <i>Naringi</i>       | <i>crenulata</i>      | Hesperethusa                   | Aurantioideae | Citrinae        | JN612920.1 |
| 47 | <i>Oxanthera</i>     | <i>neo-caledonica</i> | False orange                   | Aurantioideae | Triphasiinae    | JN612921.1 |
| 48 | <i>Pamburus</i>      | <i>missionis</i>      |                                | Aurantioideae | Triphasiinae    | JN612923.1 |
| 49 | <i>Paramignya</i>    | <i>lobata</i>         |                                | Aurantioideae | Triphasiinae    | JN612924.1 |
| 50 | <i>Paramignya</i>    | <i>scandens</i>       |                                | Aurantioideae | Triphasiinae    | JN612925.1 |
| 51 | <i>Pleiospermium</i> | <i>latialatum</i>     | North<br>Borneo<br>orangeaster | Aurantioideae | Citrinae        | JN612926.1 |
| 52 | <i>Poncirus</i>      | <i>trifoliata</i>     | Pomeroy                        | Aurantioideae | Citrinae        | EU254129.1 |
| 53 | <i>Ruta</i>          | <i>graveolens</i>     | Rue                            | Rutoideae     |                 | JN612931.1 |
| 54 | <i>Severinia</i>     | <i>buxifolia</i>      | Chinese box<br>orange          | Aurantioideae | Citrinae        | JN612927.1 |
| 55 | <i>Swinglea</i>      | <i>glutinosa</i>      | Tabog                          | Aurantioideae | Balsamocitrinae | JN612928.1 |
| 56 | <i>Triphasia</i>     | <i>trifolia</i>       | Trifoliolate<br>limeberry      | Aurantioideae | Triphasiinae    | JN612929.1 |
| 57 | <i>Wenzelia</i>      | <i>dolichophylla</i>  |                                | Aurantioideae | Triphasiinae    | JN612930.1 |

**Table S2.** Analysis of citrus leaf samples by qPCR and digital droplet PCR. Freeze-dried leaf samples were used for singleplex ddPCR (for detecting CLAs) and by duplex qPCR (for COX and CLAs) assays. Out of a total of 440 samples tested, 57 were positive by both assays. Results from 32 representative samples where the ddPCR reaction contained less than 50% positive droplets are shown in the table. Samples with excessive positive droplets are not considered suitable for absolute quantification by digital PCR. The Ct values for the two targets in qPCR, calculated copy numbers in each ddPCR reaction, and percent positive droplets and the number of positive droplets are shown. Both assays were done in duplicate, and average values are shown.

| Number | Sample<br>No. | COX<br>Ct | LAS<br>Ct | #<br>Copies | Percent<br>droplets | Positive | Positive<br>droplets |
|--------|---------------|-----------|-----------|-------------|---------------------|----------|----------------------|
|        |               | qPCR      |           | ddPCR       |                     |          |                      |
| 1      | 884           | 17.54     | 24.79     | 16540       | 50                  |          | 8023                 |
| 2      | 1548          | 16.21     | 24.51     | 16360       | 50                  |          | 7597                 |
| 3      | 1595          | 16.90     | 25.03     | 12880       | 42                  |          | 6130                 |
| 4      | 469           | 16.27     | 26.28     | 11960       | 40                  |          | 5738                 |
| 5      | 2103          | 17.00     | 25.31     | 11120       | 38                  |          | 5206                 |
| 6      | 2115          | 16.36     | 25.53     | 11100       | 38                  |          | 4003                 |
| 7      | 1143          | 16.68     | 25.24     | 10740       | 37                  |          | 4925                 |
| 8      | 1293          | 16.28     | 24.68     | 10620       | 36                  |          | 5969                 |
| 9      | 871           | 17.13     | 24.41     | 10580       | 36                  |          | 5945                 |
| 10     | 2263          | 16.41     | 25.25     | 10440       | 36                  |          | 6038                 |
| 11     | 2040          | 16.27     | 25.23     | 10260       | 35                  |          | 5359                 |
| 12     | 1670          | 16.92     | 24.24     | 9420        | 33                  |          | 4973                 |

|    |      |       |       |      |    |      |
|----|------|-------|-------|------|----|------|
| 13 | 1433 | 17.48 | 25.08 | 9220 | 32 | 4081 |
| 14 | 1765 | 17.11 | 26.12 | 9160 | 32 | 4871 |
| 15 | 706  | 17.19 | 24.39 | 8300 | 30 | 4112 |
| 16 | 1310 | 16.66 | 27.41 | 6820 | 25 | 3994 |
| 17 | 2493 | 15.97 | 26.76 | 6720 | 25 | 3133 |
| 18 | 462  | 17.19 | 25.13 | 5760 | 22 | 3240 |
| 19 | 2417 | 17.02 | 28.61 | 5560 | 21 | 2921 |
| 20 | 201  | 16.34 | 27.04 | 4860 | 19 | 3103 |
| 21 | 779  | 17.14 | 28.23 | 4700 | 18 | 3068 |
| 22 | 2278 | 16.71 | 26.78 | 3740 | 15 | 2241 |
| 23 | 2349 | 16.37 | 27.39 | 3580 | 14 | 1456 |
| 24 | 2113 | 16.13 | 27.65 | 3440 | 14 | 1872 |
| 25 | 556  | 16.32 | 28.42 | 1820 | 7  | 1124 |
| 26 | 345  | 16.97 | 29.43 | 1108 | 5  | 822  |
| 27 | 107  | 16.86 | 29.25 | 1016 | 4  | 592  |
| 28 | 1621 | 17.05 | 34.01 | 780  | 3  | 448  |
| 29 | 505  | 16.98 | 30.02 | 750  | 3  | 503  |
| 30 | 2066 | 16.53 | 30.16 | 374  | 2  | 221  |
| 31 | 714  | 16.99 | 29.35 | 332  | 1  | 226  |
| 32 | 2306 | 16.44 | 29.57 | 254  | 1  | 138  |

**Table S3.** Comparison of qPCR assays of ten-fold dilutions of a citrus DNA extraction positive for CLas. Dilutions were prepared using a healthy citrus DNA extraction (H) as the diluent. Two targets of CLas (16S and RNR) were assayed using either COX or MDH as reference genes. Average cycle threshold (Ct) values of three replications are shown. Numbers in parenthesis indicate standard deviation. In low-titer situations, Ct values for RNR (MDH as reference gene) were 2 Ct values lower than the assay detecting 16S with COX as reference (bolded and underlined data). Graphic representations are shown in Figures 3 and 4.

| Dilution         | 16S & COX |        | 16S & MDH |        | RNR & COX |        | RNR & MDH |        |
|------------------|-----------|--------|-----------|--------|-----------|--------|-----------|--------|
|                  | COX       | 16S    | MDH       | 16S    | COX       | RNR    | MDH       | RNR    |
| 10 <sup>-0</sup> | 17.83     | 23.74  | 24.69     | 23.28  | 17.9      | 23.87  | 25.56     | 23.74  |
|                  | (0.06)    | (0.14) | (0.11)    | (0.08) | (0.06)    | (0.04) | (0.57)    | (0.05) |
| 10 <sup>-1</sup> | 19.25     | 28.14  | 26.56     | 26.48  | 19.4      | 27.7   | 26.93     | 26.82  |
|                  | (0.04)    | (0.21) | (0.05)    | (0.04) | (0.08)    | (0.04) | (0.11)    | (0.08) |
| 10 <sup>-2</sup> | 19.58     | 31.86  | 27.01     | 29.81  | 19.71     | 31.43  | 27.43     | 30.29  |
|                  | (0.03)    | (0.15) | (0.05)    | (0.1)  | (0.03)    | (0.02) | (0.13)    | (0.19) |
| 10 <sup>-3</sup> | 19.3      | 36.01  | 26.94     | 34.38  | 19.53     | 34.69  | 27.31     | 33.7   |
|                  | (0.03)    | (0.15) | (0.07)    | (1.04) | (0.05)    | (0.8)  | (0.06)    | (0.58) |
| 10 <sup>-5</sup> | 19.16     | 39.58  | 26.85     | 39.11  | 19.4      | 38.82  | 27.15     | 37.58  |
|                  | (0.02)    | (0.58) | (0.09)    | (1.55) | (0.01)    | (1.77) | (0.06)    | (0)    |
| 10 <sup>-6</sup> | 19.6      | 0 (0)  | 27.17     | 0 (0)  | 19.7      | 0      | 27.55     | 0 (0)  |
|                  | (0.04)    |        | (0.02)    |        | (0.12)    | (0.89) | (0.06)    |        |
| 10 <sup>-7</sup> | 19.13     | 0 (0)  | 26.69     | 0 (0)  | 19.31     | 0 (0)  | 27.09     | 0 (0)  |
|                  | (0.07)    |        | (0.02)    |        | (0.09)    |        | (0.06)    |        |
| H                | 18.88     | 39.94  | 26.39     | 0 (0)  | 19.07     | 0 (0)  | 27.05     | 0 (0)  |
|                  | (0.03)    | (0.11) | (0.09)    |        | (0.1)     |        | (2.32)    |        |
